# Supplementary material for: Influence of crosslinking density on the mechanical and thermal properties of plant oil-based epoxy resin
Source: Royal Society of Chemistry journal article supplement (doi:10.1039/d2ra04206a), 2022-01-01
Supplement: d2ra04206a1.pdf [file d2ra04206a1.pdf]

## **Electronic Supplementary Information**

### **Influence of crosslinking density on the mechanical and thermal properties of plant oil-based epoxy resin**

Jinrui Huang<sup>1, 2\*</sup>, Pan Fu<sup>2</sup>, Wenbin Li<sup>2</sup>, Laihui Xiao<sup>2</sup>, Jie Chen<sup>2</sup>, Xiaoan Nie<sup>2\*</sup>

<sup>1</sup> Institute of Ecological Conservation and Restoration, Chinese Academy of Forestry, Beijing 100091, China

<sup>2</sup> Key Laboratory of Biomass Energy and Material, Jiangsu Province; Jiangsu Co-Innovation Center of Efficient Processing and Utilization of Forest Resources; Key Laboratory of Chemical Engineering of Forest Products, National Forestry and Grassland Administration; National Engineering Research Center for Low-Carbon Processing and Utilization of Forest Biomass; Institute of Chemical Industry of Forest Products, Chinese Academy of Forestry, Nanjing 210042, Jiangsu Province, China

#### **\*Corresponding Authors**

E-mail: huangjinruiahu@126.com; jrhuang@caf.ac.cn (J. R. Huang).

E-mail: niexiaoan@icifp.cn (X. A. Nie).

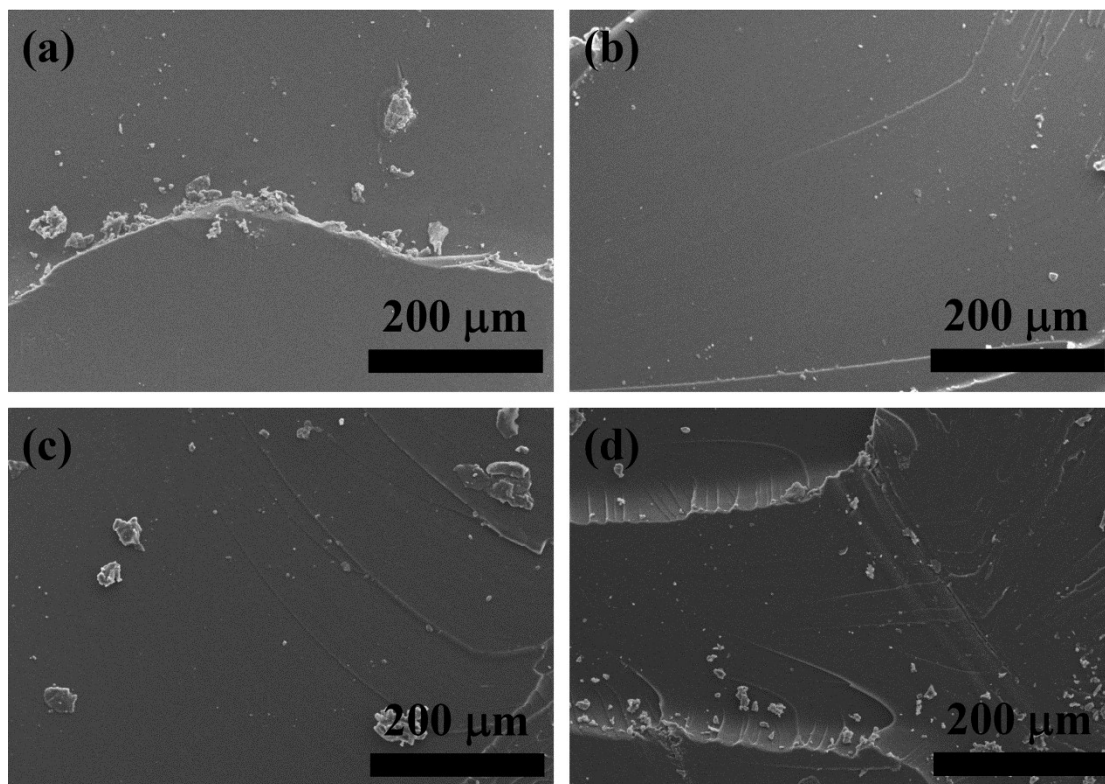

**Fig. S1** SEM images of tung oil-based epoxy resins curing with different curing agents after tensile tests: (a) TODGE-MHHPA, (b) TODGE-DDM, (c) TOTGE-MPD, and (d) TOTGE-DDM.
